# Supplementary material
Source: PubMed Central journal article supplement (PMC10164035)

# Supplementary Figure 1.

1h

2h

3h

4h

0  $\mu\text{g/mL}$

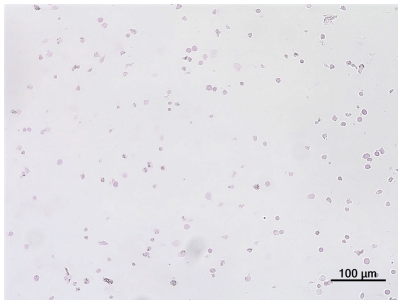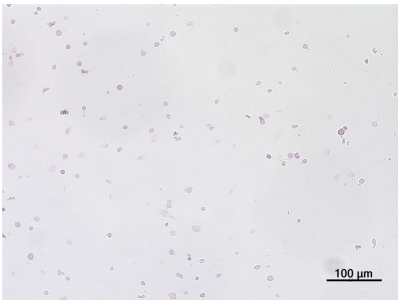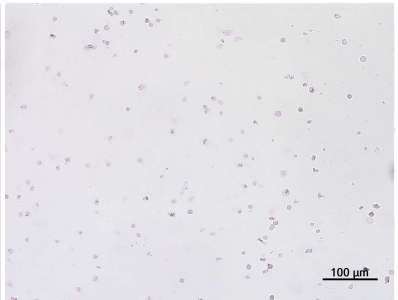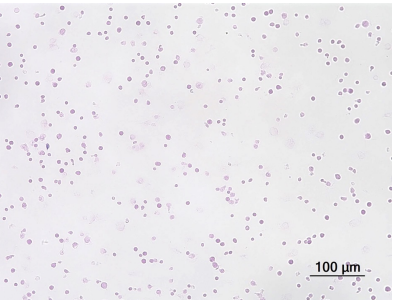

20  $\mu\text{g/mL}$

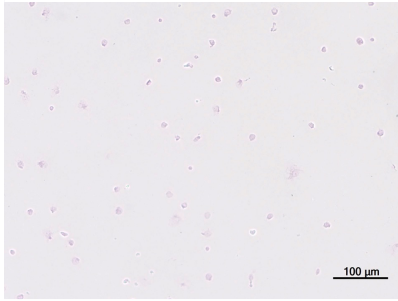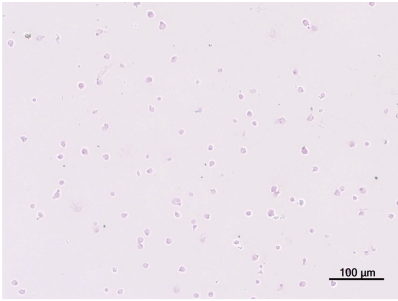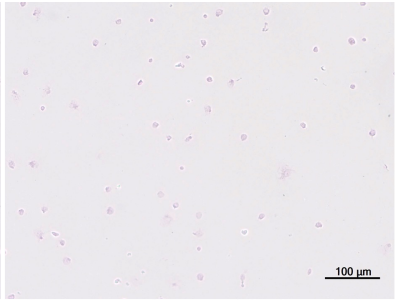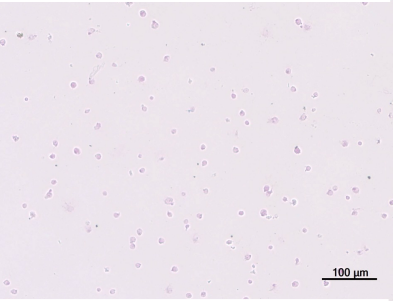

100  $\mu\text{g/mL}$

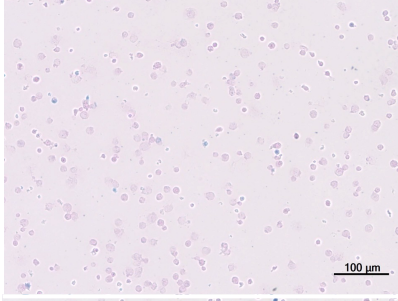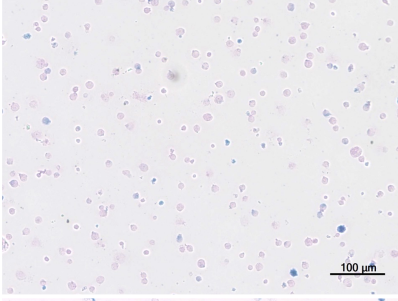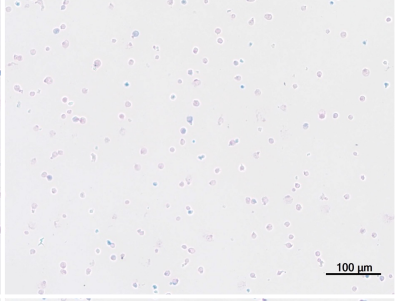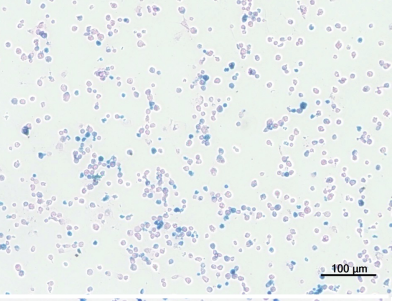

500  $\mu\text{g/mL}$

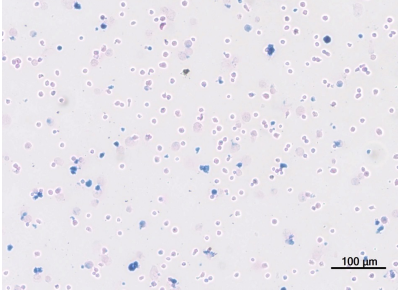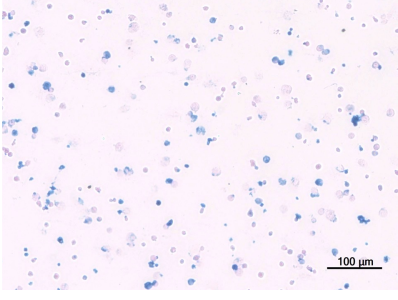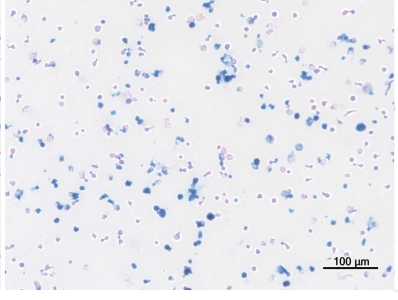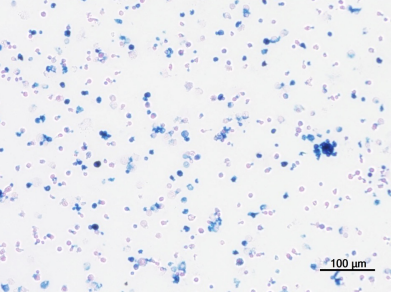

## Supplementary Figure 2.

A.

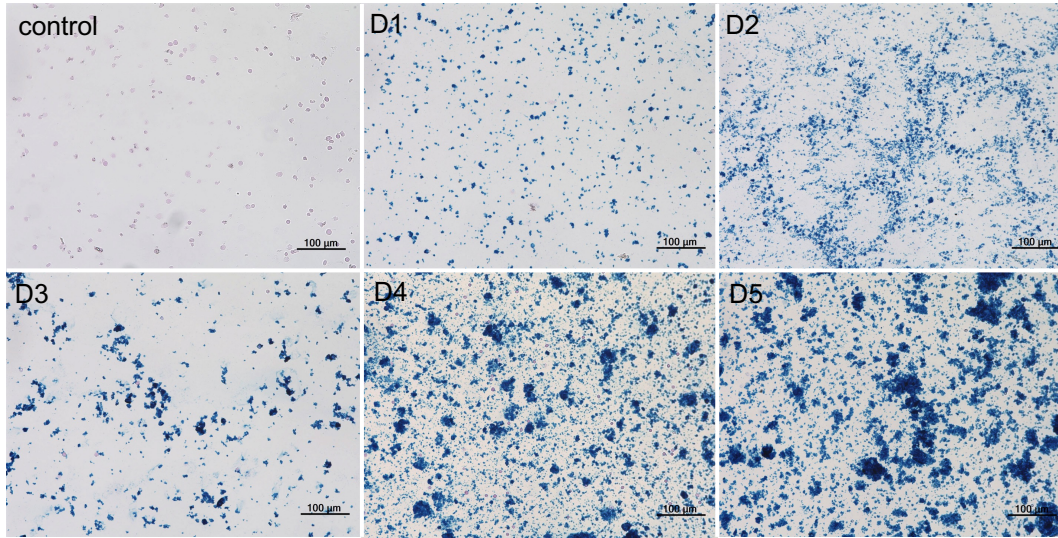

B.

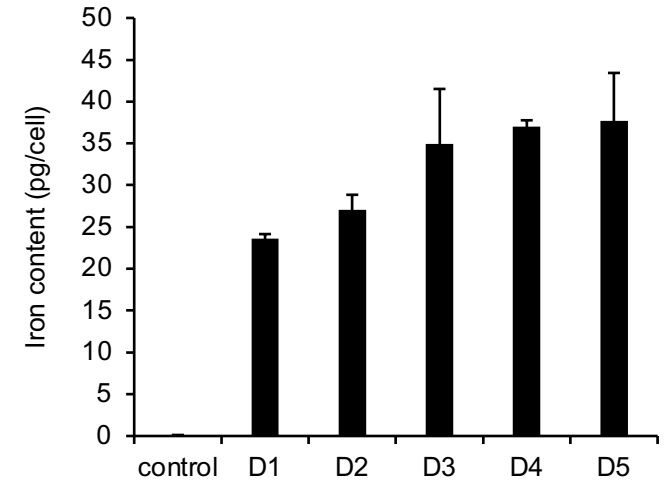

C.

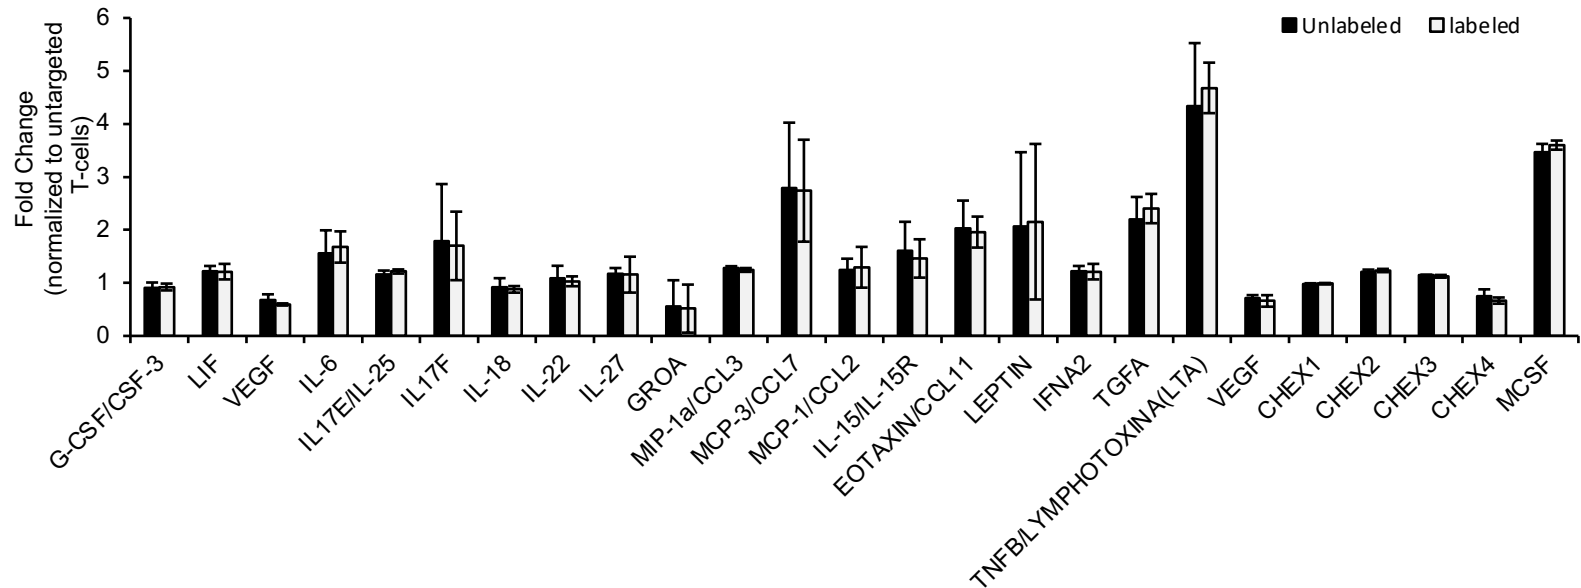



**Supplementary Figure 3.**

unlabeled CAR T-cell

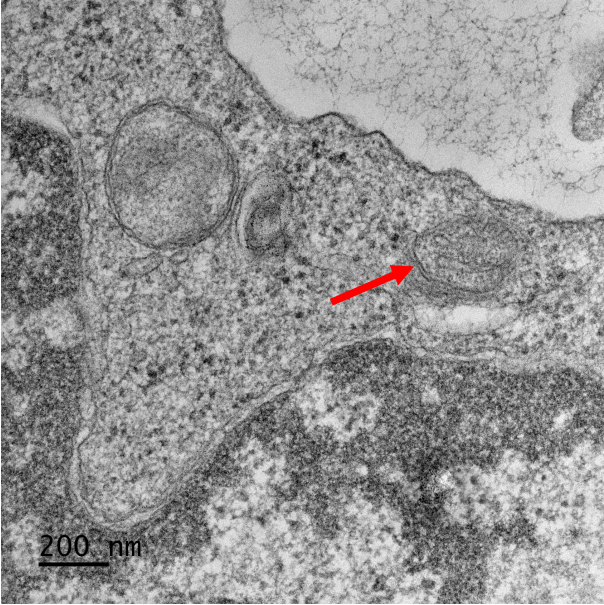

labeled CAR T-cell

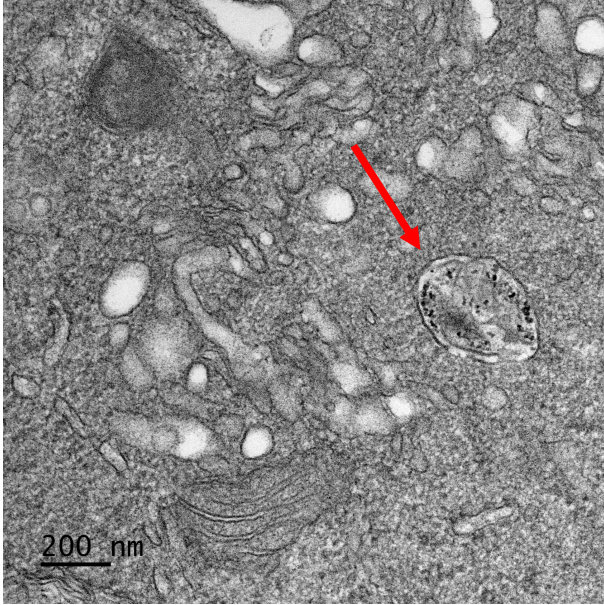

# Supplementary Figure 4.

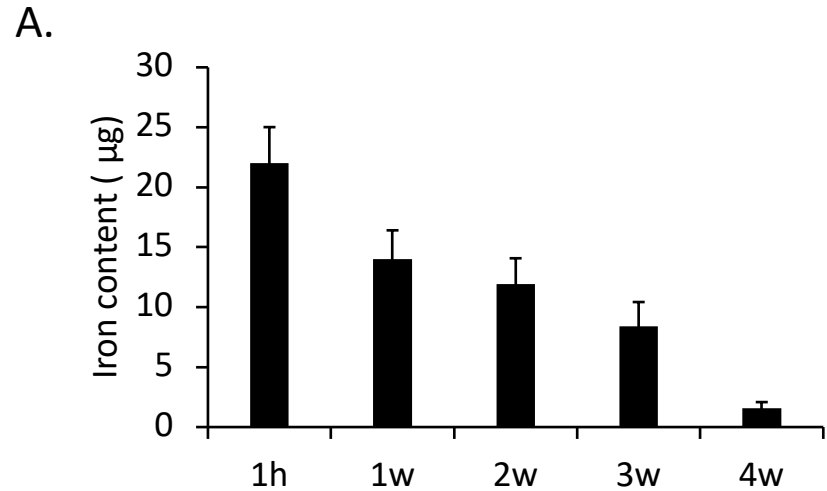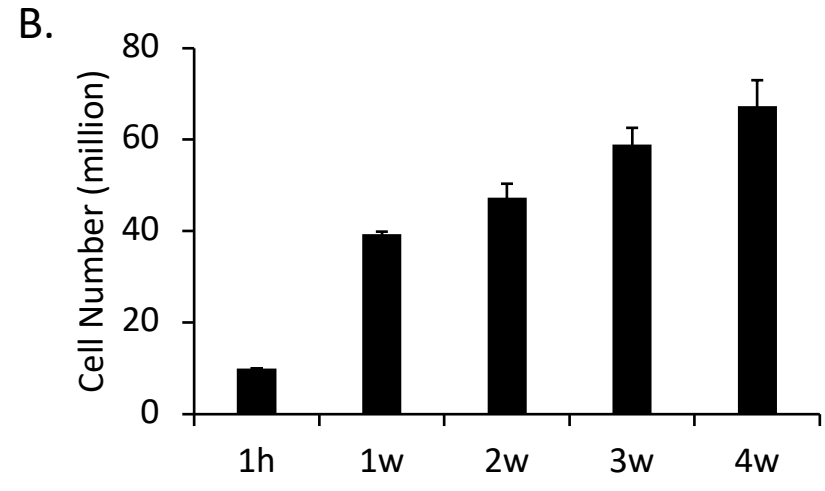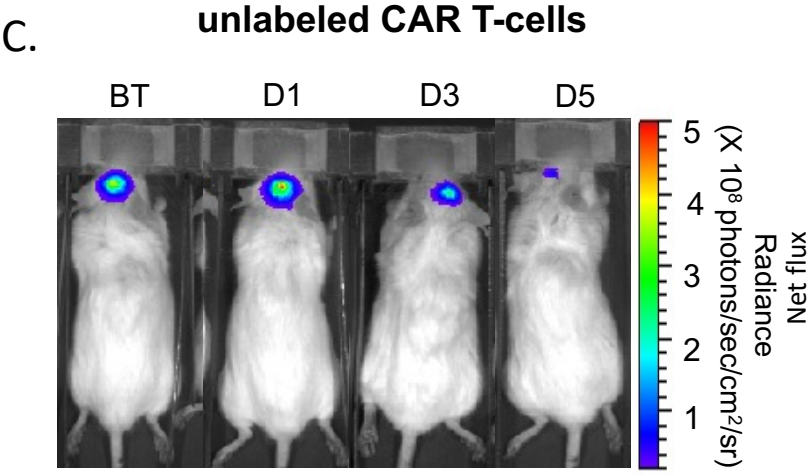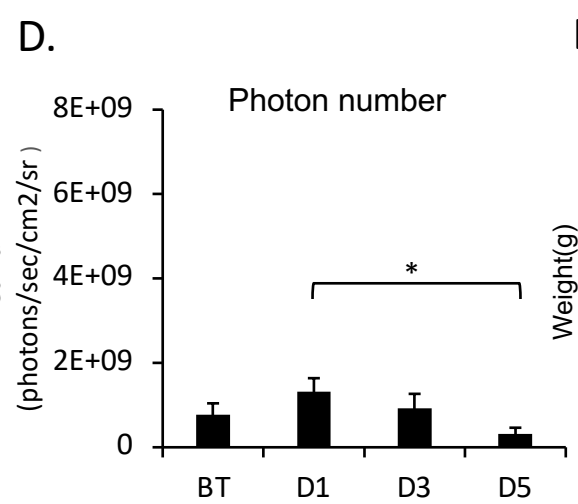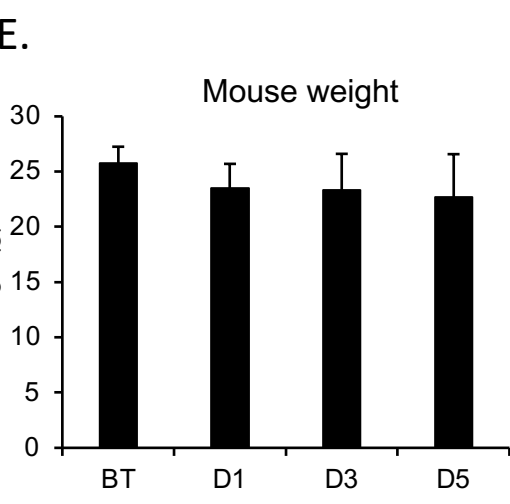



# Supplementary Figure 5.

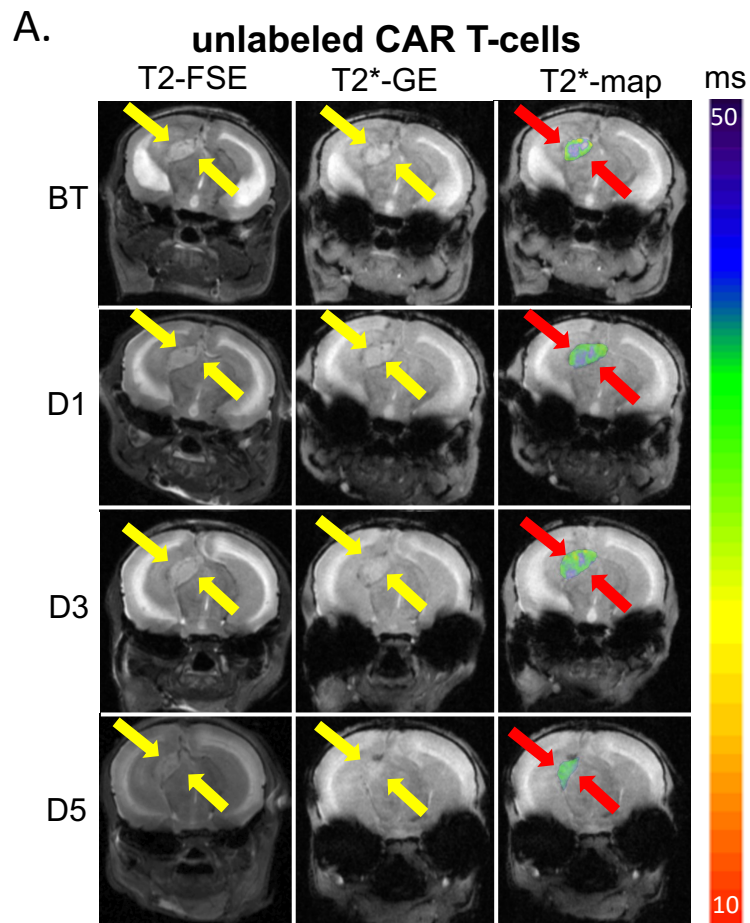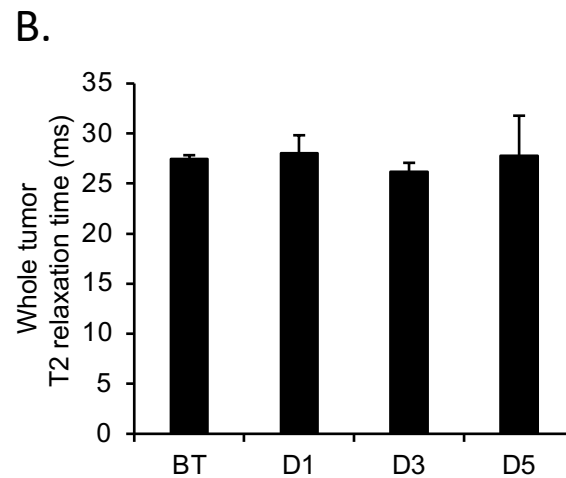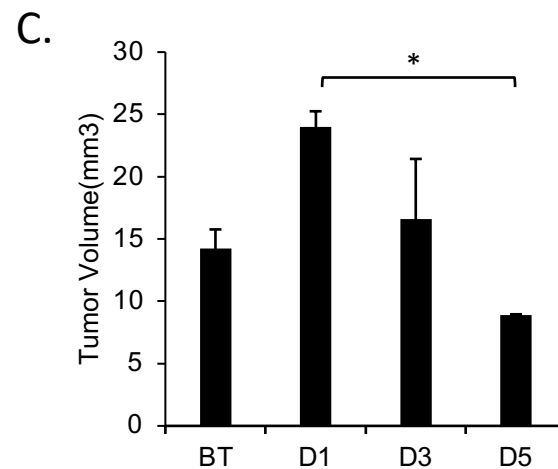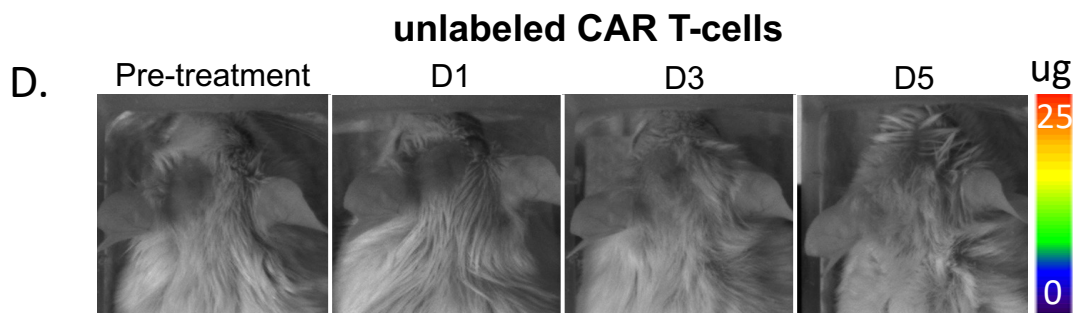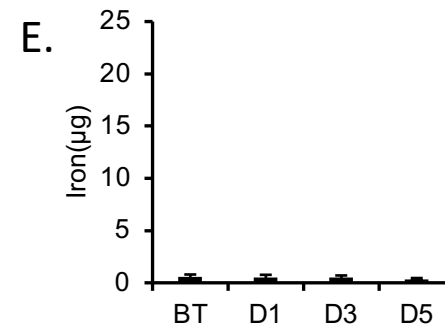

# Supplementary Figure 6.

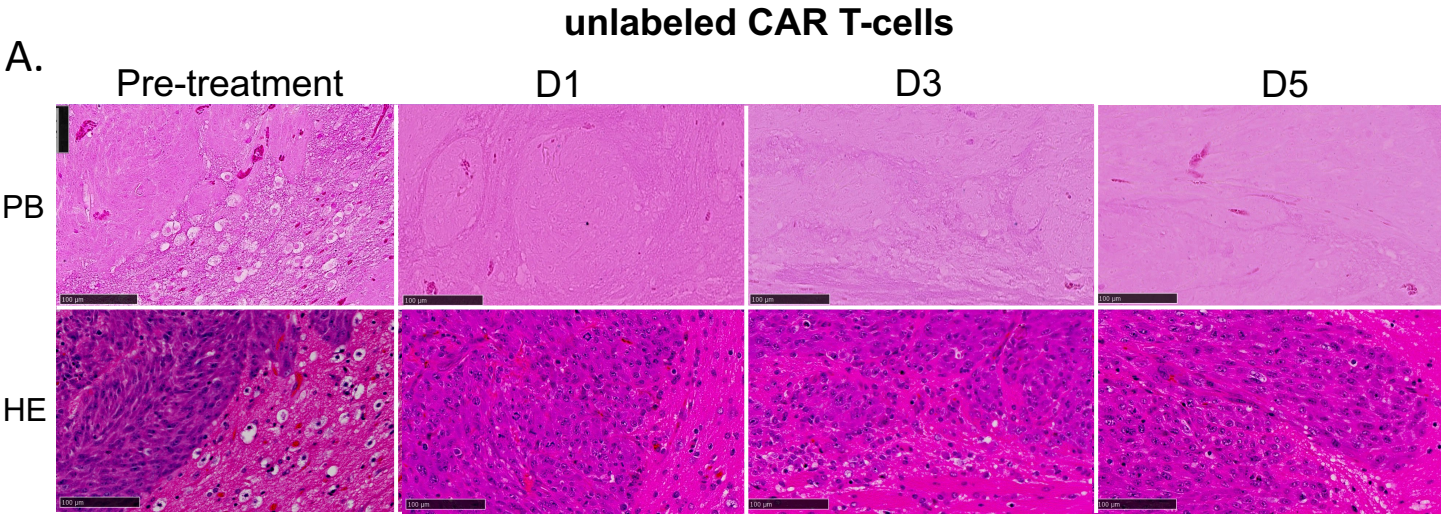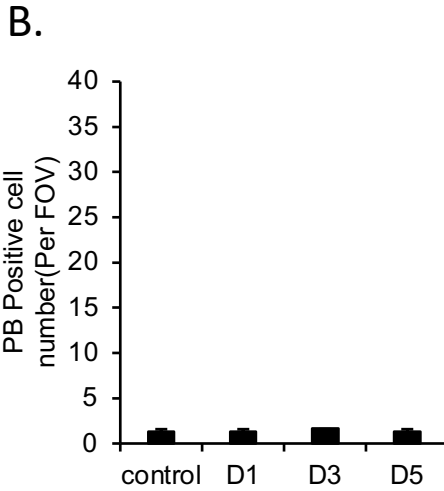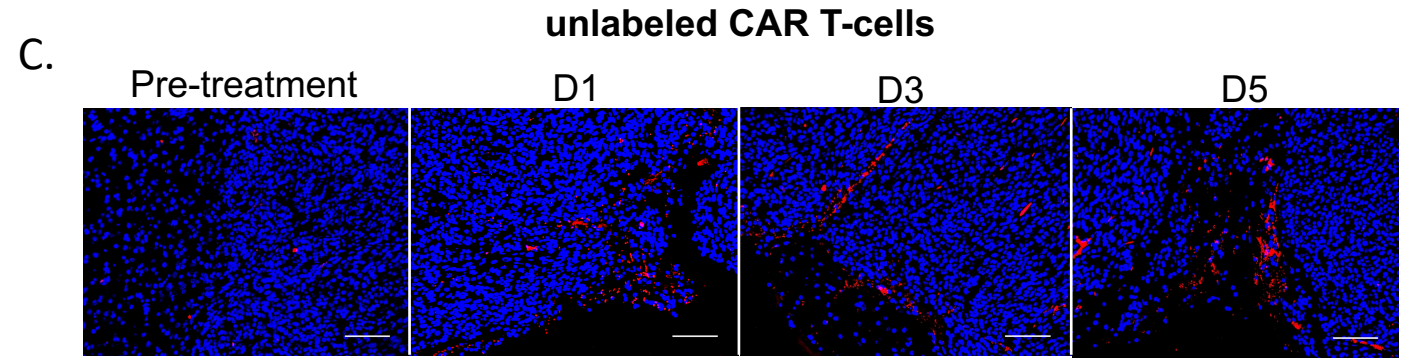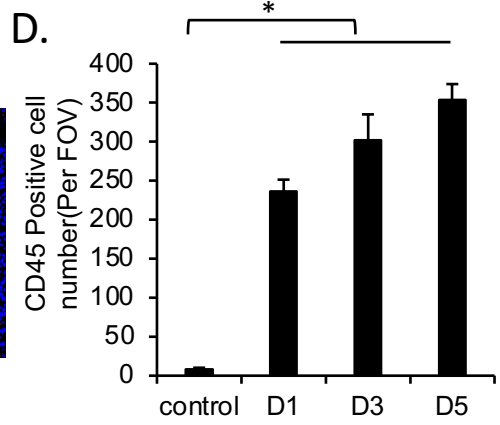

Supplement: NIHMS1850785-supplement-Supplemental_Digital_Content_Figures.pdf [file NIHMS1850785-supplement-Supplemental_Digital_Content_Figures.pdf]
